# Supplementary material
Source: Springer Nature journal article supplement (https://www.springermedizin.de/resource/supplementary/12993_2011_349_MOESM2_ESM.pdf/9617580)

### Cue P3 at Pz

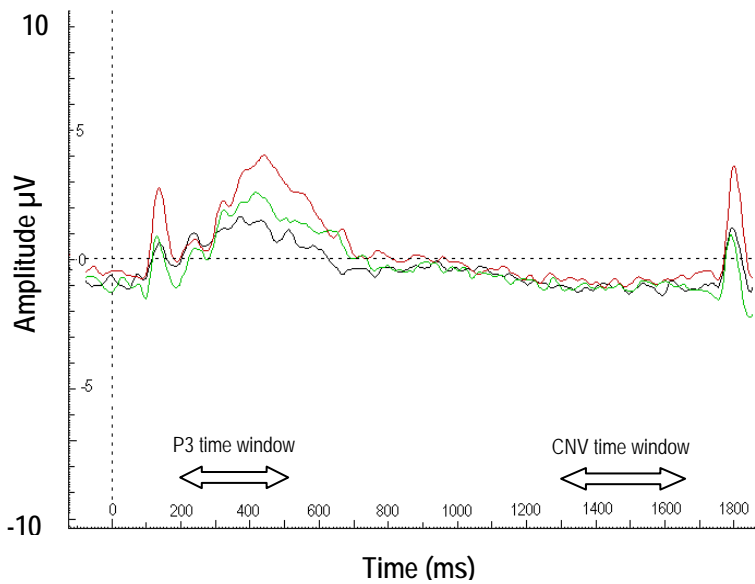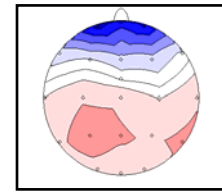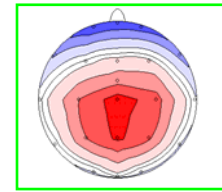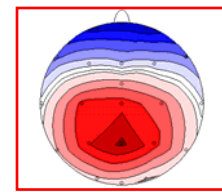

### No-go P3 at Cz

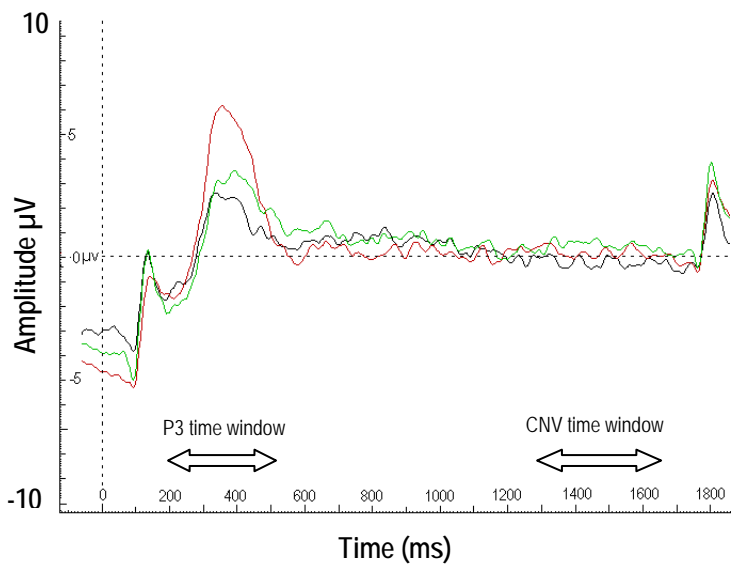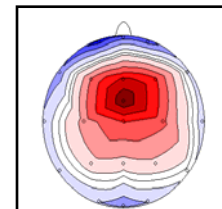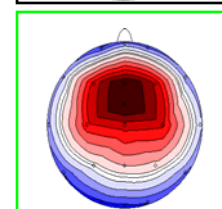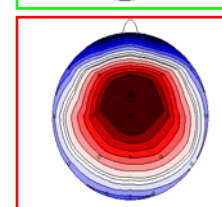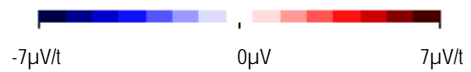

Supplement: MOESM2 [file 9617580]
